# Supplementary material
Source: publisher figshare collection journal article supplement (https://frontiersin.figshare.com/ndownloader/files/28527090)
Supplement: Supplementary file 1 [file 28527090]

## Supplementary Material

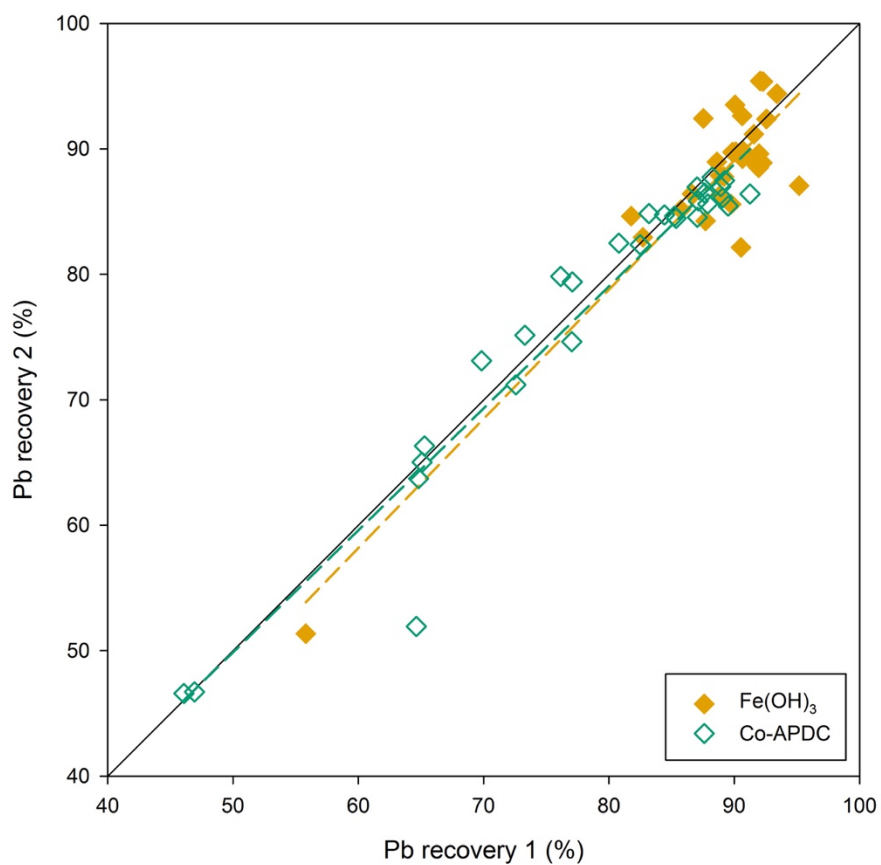

**Figure S1:** Recovery of stable lead at the last versus the first plating for samples processed using the  $\text{Fe}(\text{OH})_3$  (yellow, closed symbols) and Co-APDC (green, open symbols) methods (see section “Duplicate Profiles of  $^{210}\text{Pb}$  and  $^{210}\text{Po}$ ”). Solid line indicates 1:1 relationship, and the dashed lines show the linear regressions for each method.

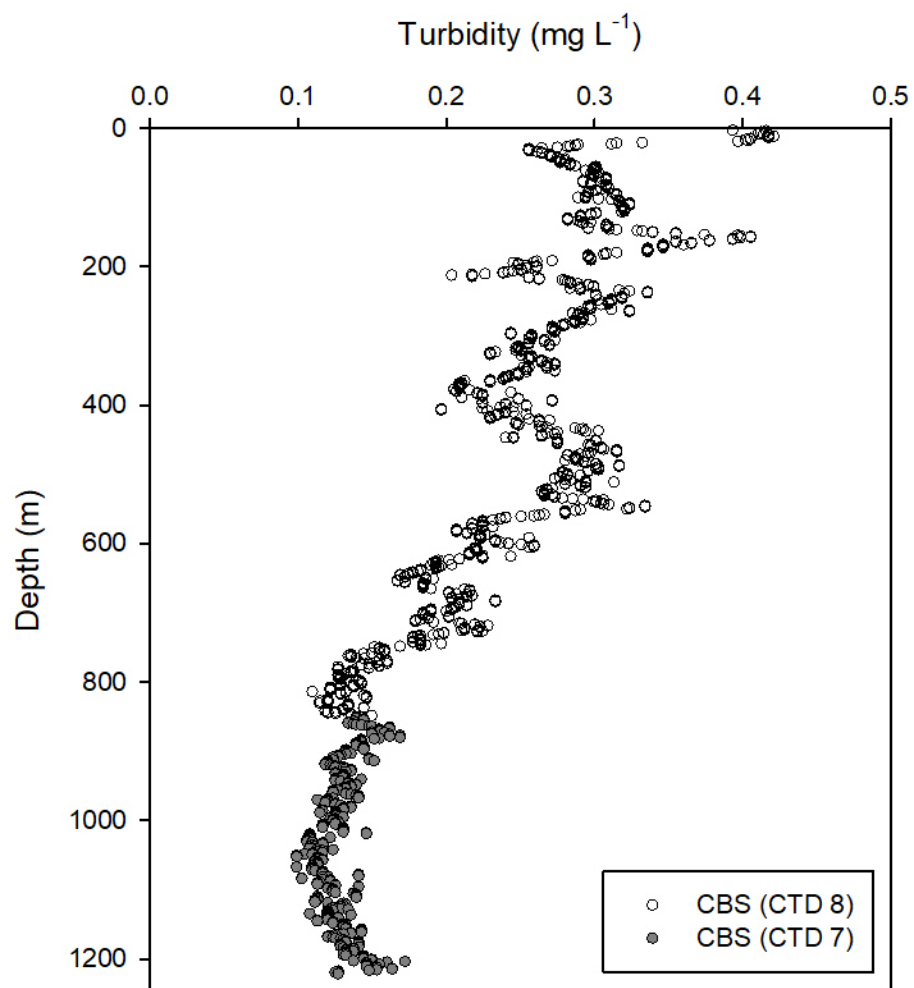

**Figure S2:** Turbidity profile at Catalano-Balear South (CBS) measured using a Seapoint Turbidity Sensor during two conductivity-temperature-depth (CTD) casts (7–8) from which <sup>210</sup>Pb and <sup>210</sup>Po samples were collected.
